# Supplementary material for: C-terminal truncation of a Tat passenger protein affects its membrane translocation by interfering with receptor binding
Source: publisher site journal article supplement (doi:10.1515/hsz-2014-0249), 2015-01-06
Supplement: Supplementary file 1 [file Legend_to_supplementary_Figure_14-249.docx]

**Legend to supplementary Figure**

**Figure S1** Thylakoid transport of the authentic OEC16 precursor (wt) and its TPP processing derivative E84M (E84M). For further details see the legend to Figure 1.
